# Supplementary material for: Molecular dissection of the oncogenic role of ETS1 in the mesenchymal subtypes of head and neck squamous cell carcinoma
Source: PLoS Genet. 2019 Jul 15;15(7):e1008250. doi: 10.1371/journal.pgen.1008250 (PMC6657958; doi:10.1371/journal.pgen.1008250)
Supplement: S2 Table — Columns A-C represents the genomic coordinates (hg19) of the 26969 ETS1 ChIP sites in SCC25 shared across three replicate ChIP-Seq experiments as determined via the IDR (Irreproducible Discovery Rate) protocol. (XLSX) [file pgen.1008250.s012.xlsx]

## Sheet: Optimal_IDR_Ets1_SCC25
chr	start	end
chr20	45945537	45946675
chr1	94166162	94168735
chr12	109231970	109232599
chr16	12008770	12010443
chr12	6959856	6962598
chr16	89381378	89385221
chr6	43701414	43702642
chr1	151137600	151138929
chr20	32398694	32400311
chr16	30932312	30936576
chr11	72145020	72146004
chr19	13276992	13279354
chr11	69064031	69068228
chr8	67578456	67580064
chr7	408439	410535
chr14	94425505	94426937
chr12	6771858	6772756
chr14	23023900	23026596
chr11	64034534	64039507
chr20	30198193	30199622
chr19	4791116	4792004
chr16	70471727	70473706
chr14	69442307	69447617
chr1	156736454	156738315
chr17	7140938	7143398
chr1	94245155	94245855
chr12	54120697	54121744
chr16	56640617	56643741
chr1	156710342	156711566
chr14	77923465	77925222
chr14	50526922	50529932
chr11	2420174	2422816
chr16	87984110	87985802
chr12	49245463	49246599
chr19	13273382	13276889
chr20	62327199	62331698
chr15	70784522	70785703
chr17	73780171	73781841
chr11	12111465	12112700
chr12	133656517	133657874
chr11	64621217	64624655
chr18	77438716	77440445
chr12	6797559	6799118
chr14	101157045	101160375
chr1	27185249	27186417
chr1	153930041	153931477
chr10	135070862	135073713
chr15	73989149	73989872
chr9	131663821	131665691
chr1	54303578	54304506
chr19	44617071	44618190
chr5	133838837	133839696
chr8	110345680	110346937
chr20	18268276	18269902
chr5	173043032	173044063
chr12	48146950	48147870
chr1	19252656	19254990
chr8	145132292	145134158
chr16	2885311	2887073
chr19	56651516	56653230
chr1	169862320	169863619
chr14	73493252	73494278
chr11	70004259	70009509
chr9	132625272	132626106
chr14	24700704	24702610
chr8	124193208	124196045
chr5	66544282	66544928
chr13	30276965	30277700
chr1	92269458	92270660
chr19	16606553	16607795
chr20	62312946	62314500
chr8	134229718	134230717
chr14	21978774	21979916
chr19	54617472	54619349
chr14	96670472	96673519
chr16	574982	579825
chr12	88535367	88536769
chr19	42748136	42749684
chr1	33899184	33899739
chr14	77422136	77423662
chr18	19191993	19193008
chr10	36823474	36824002
chr12	120665606	120670616
chr12	89764391	89764988
chr17	48128252	48129224
chr11	73307760	73310004
chr19	44555293	44556586
chr2	27592579	27594546
chr19	12892384	12896196
chr9	136008758	136011223
chr1	1051122	1052323
chr20	49461019	49462215
chr22	23567448	23568476
chr7	128864229	128865585
chr16	67839147	67841517
chr19	46365692	46368005
chr19	42746181	42748059
chr9	102860634	102862044
chr19	45926365	45927975
chr5	141736107	141737272
chr8	145021961	145027483
chr12	132194825	132196656
chr16	69372972	69374426
chr1	26324039	26325100
chr3	126629637	126631227
chr19	13260220	13267702
chr22	19466097	19467932
chr20	62586624	62589721
chr5	34914940	34916282
chr1	202317450	202318409
chr14	73082114	73082958
chr2	219134240	219136402
chr17	27275855	27279777
chr11	65769247	65770600
chr20	62693723	62696154
chr16	11038082	11039010
chr16	65691793	65692885
chr8	42146900	42148853
chr17	62703068	62703919
chr3	13893421	13896064
chr10	106097236	106099179
chr3	197102499	197103293
chr17	21116811	21118430
chr3	141656224	141657246
chr10	79151568	79153156
chr10	33246216	33247848
chr17	26662119	26663622
chr10	103113285	103114562
chr9	137262576	137264443
chr2	70823410	70824347
chr1	156022740	156025449
chr10	79708843	79709578
chr16	15766463	15767244
chr8	144698041	144700877
chr18	21451259	21451839
chr6	28048091	28049338
chr12	107167637	107168895
chr19	59030093	59031773
chr19	11545545	11547697
chr5	171432654	171434323
chr2	63815120	63816556
chr17	17494516	17496122
chr5	175874061	175876096
chr18	9743354	9744066
chr14	67885109	67886354
chr10	74078636	74083962
chr4	99369568	99370633
chr12	125412203	125414280
chr22	27869444	27872151
chr6	42531340	42532634
chr8	28747116	28748347
chr19	36206436	36210157
chr8	145006329	145019423
chr1	1310039	1312013
chr12	109914193	109915911
chr2	20430971	20432988
chr19	58837829	58839035
chr3	156892163	156893156
chr2	3622110	3623886
chr19	51610440	51612431
chr17	38082864	38084577
chr11	71009713	71011070
chr1	10531776	10532887
chr14	93509358	93511994
chr11	70048266	70050777
chr19	19029776	19030895
chr14	65568328	65570111
chr20	44599667	44601730
chr10	105517141	105518392
chr20	36154386	36155063
chr16	67260151	67261797
chr14	67880000	67881442
chr16	67880140	67881958
chr3	193586864	193589246
chr22	44756150	44757861
chr14	74272993	74273804
chr17	48715531	48717130
chr20	2644075	2645159
chr9	95431373	95433280
chr9	129748076	129749509
chr16	75339155	75339885
chr13	21005027	21005748
chr16	1470126	1471402
chr3	193858370	193860486
chr14	69417447	69420337
chr10	79657741	79659569
chr2	74236911	74237892
chr1	17613759	17614728
chr5	37889963	37890665
chr8	74883878	74885229
chr7	99697879	99699912
chr7	73726517	73727633
chr19	3154854	3156010
chr1	45965216	45966411
chr3	193851501	193853282
chr8	49230852	49232085
chr7	5588715	5589637
chr12	133562582	133563705
chr16	2020921	2022909
chr1	31228846	31231207
chr2	173117884	173118869
chr5	138726842	138729551
chr3	189042315	189042889
chr17	62501362	62503704
chr19	47353535	47354773
chr12	112035105	112038043
chr2	153057020	153057555
chr1	152019790	152021286
chr9	132650478	132651603
chr3	155571191	155573114
chr16	11590967	11591848
chr19	2088930	2090825
chr6	14271063	14271780
chr1	109642331	109643946
chr16	82667522	82668336
chr6	37023218	37024899
chr11	72851715	72854696
chr7	30953426	30955685
chr11	73498756	73499846
chr7	88223	89948
chr12	133531720	133533479
chr22	33040231	33041369
chr9	131654149	131655617
chr19	18484435	18485854
chr14	71248982	71249426
chr6	30875425	30876255
chr19	55727461	55729012
chr20	25676591	25677859
chr1	8271780	8272541
chr12	58281724	58284297
chr1	27070474	27071092
chr1	93810894	93812440
chr1	150583860	150584665
chr2	65543058	65543888
chr5	145561605	145562658
chr1	100597992	100599036
chr1	6547801	6552494
chr9	116340628	116342578
chr20	30945336	30947367
chr3	183892227	183893788
chr2	10633419	10634466
chr14	102746201	102747408
chr1	22108912	22110760
chr8	48294044	48294515
chr7	73131591	73133949
chr19	37262146	37264339
chr6	41690645	41691867
chr12	125092769	125094896
chr19	55627176	55629591
chr8	101732912	101735361
chr5	38845539	38847184
chr12	121789695	121790769
chr7	5633279	5637023
chr6	30778565	30779445
chr16	2917660	2918715
chr10	75648171	75649529
chr12	7079087	7080625
chr1	37939045	37946528
chr8	145157515	145160784
chr12	133404317	133406222
chr19	18874007	18876408
chr6	3848703	3851103
chr7	1543130	1544545
chr16	86697633	86699038
chr13	99128444	99129258
chr11	64863026	64864491
chr19	58891717	58893987
chr19	45946142	45947990
chr12	54582363	54583151
chr11	47600009	47601054
chr21	36179509	36181365
chr1	38455113	38456351
chr1	163291318	163292080
chr14	73025527	73026727
chr9	131673507	131676462
chr19	13043367	13045000
chr19	14191657	14193368
chr5	90607471	90608312
chr16	15149118	15150856
chr19	39389568	39390999
chr8	144896380	144899459
chr1	2456555	2459981
chr19	44668881	44669629
chr18	67872465	67873464
chr1	154945021	154945805
chr20	16710137	16711343
chr1	16478602	16482999
chr2	88990557	88992049
chr11	69068481	69070652
chr10	103892296	103893923
chr14	21457702	21458724
chr1	6672729	6675424
chr11	71813570	71815225
chr14	69657969	69658941
chr6	44001946	44003148
chr11	118305258	118308869
chr3	193806809	193807900
chr19	12899255	12905152
chr9	138852182	138853590
chr14	65189232	65190224
chr19	13226004	13228190
chr8	119128510	119129040
chr13	41768127	41769102
chr10	116303842	116304490
chr8	49608277	49609354
chr7	150754469	150755966
chr11	46721415	46723190
chr17	29923043	29924317
chr17	47600709	47601551
chr8	56986585	56987468
chr9	104160577	104161776
chr12	861066	863630
chr16	2096939	2098911
chr7	92861083	92862145
chr2	220113000	220114788
chr19	17325342	17327121
chr17	6572235	6573622
chr7	101273508	101275142
chr14	96735111	96736078
chr12	56435027	56436420
chr3	171678506	171679089
chr16	19534678	19535529
chr17	48104065	48106890
chr2	74755855	74758233
chr11	2199710	2202637
chr12	6832829	6834022
chr1	9895250	9897241
chr1	94240700	94241204
chr14	35590872	35592235
chr1	151964655	151967316
chr18	33888860	33890098
chr11	66789138	66792683
chr14	90909694	90911005
chr22	46364508	46366243
chr20	2450698	2451860
chr9	132095949	132097548
chr19	51013950	51015270
chr7	100780935	100782177
chr14	69408433	69409884
chr9	91932962	91933957
chr8	128680660	128681902
chr2	43268303	43269796
chr6	86173938	86174869
chr9	125145430	125147090
chr11	71638892	71640588
chr11	72352629	72355242
chr19	39902559	39905186
chr9	131900379	131903354
chr5	40834897	40836355
chr14	58764136	58766654
chr2	112732606	112733150
chr5	150949976	150951613
chr3	141030130	141031182
chr18	71814539	71815996
chr17	76588260	76589048
chr21	40684221	40687261
chr2	198363558	198365522
chr9	130123630	130124409
chr11	86012913	86013663
chr19	44598146	44599557
chr1	153537796	153539472
chr10	104401727	104406758
chr10	72237178	72239312
chr11	64084273	64087354
chr20	56269561	56270963
chr9	123341914	123342790
chr12	104322996	104325042
chr1	107598598	107600545
chr9	136282946	136283715
chr8	26308640	26309693
chr1	224690520	224691747
chr11	13094904	13095558
chr22	20861469	20862713
chr2	232645377	232646640
chr1	46648460	46649604
chr3	125927143	125928284
chr6	33806755	33808609
chr19	41731597	41732912
chr18	3261493	3262795
chr4	103747263	103749764
chr11	67079004	67080905
chr9	102195760	102196249
chr20	2488577	2490333
chr9	95524978	95528203
chr11	71790578	71792652
chr20	30300316	30301515
chr14	70465541	70466660
chr19	49999023	50000006
chr11	72504578	72505690
chr19	58816410	58817283
chr2	43445747	43447612
chr19	44506693	44507564
chr11	70243403	70247139
chr14	74222638	74223735
chr13	41706539	41707215
chr16	69419300	69420259
chr14	68140833	68142296
chr3	193310723	193311517
chr1	36614621	36616861
chr3	50396371	50397542
chr3	196064285	196065740
chr19	38652670	38653729
chr16	84533923	84535571
chr16	53737487	53738339
chr16	66549243	66552082
chr2	95980616	95983562
chr1	95018779	95019224
chr7	44529559	44530656
chr5	40755254	40756487
chr2	113341534	113342684
chr11	69862349	69863452
chr1	40434698	40436476
chr6	31926116	31927343
chr19	50144688	50146173
chr2	46191218	46191762
chr7	134001132	134002096
chr11	61559578	61560929
chr3	128879634	128881145
chr8	37707036	37707679
chr16	84393709	84394471
chr15	74691863	74693168
chr20	35723511	35725037
chr1	95085891	95087380
chr18	46360364	46361680
chr5	39101009	39101508
chr6	134273998	134274970
chr17	27910481	27911804
chr19	10229345	10230964
chr1	35220192	35221958
chr7	24860951	24861692
chr2	96930593	96932683
chr8	95731566	95732590
chr19	45906966	45910573
chr19	44716212	44717035
chr5	131801991	131803068
chr15	91412766	91413404
chr14	77427842	77429119
chr5	168005751	168007114
chr12	89744468	89746929
chr12	28185865	28186378
chr17	47491959	47493112
chr19	11202028	11202863
chr20	56592187	56594012
chr16	9221240	9222848
chr18	74826419	74827587
chr14	104027686	104029806
chr16	47746332	47747489
chr9	123155946	123156936
chr11	65682090	65684902
chr8	103817173	103821368
chr6	43595792	43598361
chr19	13055985	13057360
chr19	39899951	39901356
chr20	40321298	40322440
chr6	17705664	17707509
chr2	40098305	40098826
chr7	30202925	30203546
chr10	95143452	95144305
chr8	145647382	145650450
chr19	42710200	42712560
chr8	143750259	143752135
chr8	125784230	125784918
chr1	109372845	109373572
chr7	2902506	2905493
chr9	134531621	134532351
chr9	131964789	131966145
chr6	36650138	36650953
chr13	26827796	26829208
chr1	24124721	24128279
chr11	72904126	72907070
chr1	151519575	151520721
chr22	47053872	47055641
chrX	153596483	153598488
chr5	10654758	10656256
chr2	235166632	235168114
chr6	30709474	30712749
chr2	74153697	74154430
chr16	66555380	66556529
chr19	44439043	44439794
chr6	31631570	31634512
chr17	33913997	33914951
chr1	95538036	95538974
chr1	2358567	2360329
chr12	39298413	39300812
chr19	16180624	16181871
chr17	48140678	48142572
chr15	67442377	67443183
chr19	9731363	9732584
chr12	76413861	76414501
chr1	40723221	40724486
chr10	134384151	134386308
chr12	33049214	33050373
chr5	14809446	14810537
chr6	41700349	41703862
chr9	136202196	136203665
chr15	50646283	50647895
chr16	30661187	30663329
chr20	35983979	35988428
chr5	150952198	150952685
chr10	111985377	111986520
chr16	8942244	8945233
chr22	21379319	21380569
chr20	62288957	62290725
chr1	204072731	204074368
chr15	98708740	98709604
chr8	134315028	134316046
chr1	179851112	179852515
chr19	19886782	19887935
chr19	11038740	11040300
chr6	33557309	33559570
chr14	105491104	105491650
chr1	109370576	109371435
chr19	35167708	35169290
chr10	105631614	105632681
chr22	38708823	38710445
chr2	20410997	20414471
chr7	130597939	130598499
chr8	49782483	49783510
chr1	205179908	205181177
chr15	31664682	31665768
chr12	30947027	30950251
chr9	96927821	96929596
chr5	81652790	81653545
chr10	112173974	112174869
chr2	234327181	234328593
chr3	196668623	196670172
chr3	197182651	197184117
chr20	47804101	47805544
chr9	129928894	129929717
chr11	69488937	69490510
chr11	65558409	65561528
chr8	141655823	141657071
chr8	142023031	142024460
chr1	25888782	25889797
chr17	80173157	80176102
chr11	69922749	69927418
chr20	10415557	10416204
chr2	85730378	85732618
chr2	242575700	242577625
chr15	90364431	90368188
chr9	136738192	136742589
chr2	27303611	27304599
chr19	49298341	49299069
chr11	119566785	119568041
chr22	39704455	39707276
chr6	33289453	33291663
chr1	27648365	27649249
chr4	26198948	26199427
chr6	27840861	27841775
chr1	30850461	30853404
chr16	1741551	1742652
chr1	2221248	2223196
chr12	56320420	56322143
chr1	31121656	31123628
chr6	110500577	110502017
chr18	9474179	9476209
chr2	172543704	172544818
chr8	144717355	144719529
chr16	57496360	57497265
chr14	23305376	23309083
chr2	27434195	27435542
chr8	142182117	142185679
chr2	43083168	43085588
chr10	105667887	105668439
chr12	50134878	50136277
chr6	35337847	35338680
chr1	201227930	201229742
chr19	9694627	9695597
chr12	58158608	58161298
chr8	62672160	62673243
chr2	242446683	242448951
chr11	119571139	119572003
chr18	21452547	21453424
chr7	5435939	5437864
chr3	50329204	50330575
chr8	10568132	10569215
chr17	46560370	46561489
chr19	42363576	42365415
chr9	130212517	130214775
chr1	231113716	231115204
chr1	203764525	203765681
chr16	2202674	2207298
chr5	153008480	153009029
chr6	30716234	30717167
chr8	103800829	103801864
chr20	34823926	34824749
chr20	10982323	10983128
chr10	106087121	106090386
chr12	498001	499119
chr7	128694315	128695524
chr14	105281248	105283261
chr6	166970302	166970970
chr1	36838197	36840827
chr15	84047222	84049749
chr7	510876	512420
chr19	4181761	4182969
chr2	239335026	239336570
chr15	22953917	22957232
chr12	106620825	106621813
chr8	144652997	144657996
chr15	70778610	70780003
chr16	87839384	87841211
chr18	35021124	35022267
chr1	95087674	95089831
chr20	30697056	30698278
chr5	134721365	134722774
chr15	79295031	79297370
chr22	39915635	39917267
chr2	74699106	74700126
chr1	210430587	210431721
chr16	30906925	30908772
chr22	24949992	24952423
chr8	125868925	125869882
chr19	50528140	50529680
chr15	79280636	79281309
chr9	127580371	127581932
chr11	68888552	68891922
chr1	169763657	169764644
chr1	93544426	93545628
chr8	92052643	92053464
chr16	739202	741250
chr14	21944632	21945926
chr8	37593749	37595551
chr7	48127571	48129587
chr19	44808746	44809439
chr1	44411943	44413631
chr2	170429698	170430662
chr15	74753216	74754084
chr11	35132669	35133696
chr16	28873901	28876060
chr16	2209853	2214192
chr6	8064056	8065012
chr20	19295138	19296001
chr11	70399492	70400508
chr16	69564312	69564977
chr6	170151295	170152366
chr20	60734093	60736889
chr11	121336424	121337811
chr17	76374047	76375381
chr19	52074214	52074865
chr9	124319849	124322303
chr17	73696000	73697544
chr19	9250742	9251637
chr20	30160087	30161708
chr20	49046829	49048572
chr3	181900360	181900755
chr3	170625731	170627326
chr11	130902957	130903632
chr20	56267371	56269197
chr7	150923724	150924951
chr11	69338799	69341059
chr9	71735432	71737486
chr7	30839022	30840890
chr12	123431086	123432710
chr3	152939492	152940262
chr7	92533591	92534044
chr5	176778078	176779520
chr15	101469411	101470349
chr5	55419537	55419973
chr6	170861926	170862593
chr1	200638401	200639761
chr8	100024955	100026001
chr5	74062509	74063602
chr11	70951200	70952989
chr19	12778665	12781773
chr1	114354260	114355378
chr5	180648498	180651353
chr11	2222909	2224465
chr16	87416404	87418665
chr2	178128090	178130330
chr17	37893763	37898045
chr10	130427561	130428279
chr1	2186039	2188366
chr16	28857108	28858537
chr7	99155711	99156942
chr8	42910843	42912235
chrX	103401194	103401878
chr19	5680134	5681391
chr4	152681848	152682547
chr5	175815103	175816664
chr11	72896086	72897934
chr7	5646847	5648840
chr15	23810496	23811806
chr13	20993331	20994599
chr22	38520146	38522048
chr1	201365687	201369780
chr12	52609102	52610300
chr6	42194335	42194905
chr1	36627466	36628126
chr5	133801305	133803107
chr6	43692432	43694192
chr9	132538904	132541204
chr7	6413748	6415071
chr3	127842091	127843071
chr17	57696453	57698130
chr8	103669440	103670201
chr2	75833807	75835061
chr11	66800318	66801598
chr6	143718510	143719277
chr19	11615674	11617381
chr6	163767958	163768920
chr1	1655543	1656133
chr14	77370453	77371656
chr1	8257541	8258514
chr19	49121551	49123208
chr17	7254221	7256865
chr3	156877020	156878742
chr13	31734973	31736782
chr18	56554609	56555265
chr4	2427181	2428470
chr14	81686689	81688036
chr19	11434356	11436223
chr1	98789428	98789923
chr11	65666220	65668585
chr1	31869231	31871183
chr12	57880892	57882315
chr17	78388127	78389769
chr19	46233399	46234589
chr7	5549045	5549850
chr5	131761856	131762815
chr16	2653083	2653963
chr2	217276801	217277967
chr16	49056526	49057451
chr17	27481548	27483752
chr19	35224513	35225587
chr12	66563030	66564160
chr8	143483338	143486132
chr19	19430744	19432650
chr10	114206011	114207459
chr11	118779016	118785584
chr22	36726613	36729583
chr1	15742320	15744489
chr19	50083338	50084928
chr6	158489266	158490586
chr12	53610151	53612146
chr9	140505375	140508190
chr16	11294926	11296764
chr2	70843147	70843989
chr17	45144572	45145098
chr3	14692772	14693751
chr14	62028022	62029527
chr2	95830850	95831965
chr9	137516453	137517652
chr19	3434502	3435634
chr16	57311189	57312161
chr8	103665818	103669357
chr19	57946293	57947366
chr11	68847316	68849697
chr1	27438078	27439257
chr19	31704898	31705873
chr19	42702920	42704923
chr11	64124594	64128188
chr7	123387662	123389781
chr16	3069955	3074653
chr3	183852550	183853758
chr18	3246595	3248327
chr11	58345062	58347520
chr17	25680056	25681578
chr17	79302898	79304335
chr6	3023094	3024882
chr6	2764886	2766970
chr2	85645101	85646781
chr9	131929060	131929862
chr14	81999741	82000686
chr19	19773790	19775130
chr19	42462334	42464207
chr9	21684781	21685278
chr3	50387768	50389237
chrX	64754133	64755039
chr16	30101295	30104239
chr6	34210421	34212721
chr8	124720162	124721465
chr11	9481791	9483238
chr16	66906799	66907996
chr12	24872326	24872733
chr11	69807564	69809450
chr2	11969473	11970698
chr2	70313261	70315944
chr9	100985156	100986080
chr16	85783214	85787536
chr15	83980723	83981289
chr19	18043086	18044760
chr2	109237369	109237917
chr2	69405281	69405788
chr6	692254	693841
chr20	6102974	6104477
chr21	36510930	36511509
chr18	46359240	46360214
chr3	52079226	52082859
chr19	6765872	6766823
chr11	59474218	59474723
chr7	141437613	141438506
chr10	64563873	64565879
chr11	69188757	69194168
chr10	74008081	74009084
chr3	196294980	196296345
chr11	118971173	118973593
chr1	16277850	16279748
chr6	170863109	170863959
chr16	70487941	70488950
chr11	72903222	72904033
chr10	60144685	60145846
chr15	101707903	101709345
chr8	128863605	128867275
chr15	86879216	86879704
chr7	2760356	2761091
chr16	84871279	84873923
chr7	576764	579959
chr9	130323662	130325047
chr14	30692583	30693006
chr14	65174415	65175807
chr10	32428001	32428784
chr12	48156806	48158003
chr15	90708896	90709773
chr1	156697866	156699035
chr10	6317022	6317814
chr18	47813466	47814776
chr19	45056526	45057509
chr13	41837358	41838156
chr11	64577141	64578738
chr8	146051754	146054789
chr3	159599536	159599967
chr9	131084496	131085625
chr10	124913394	124914676
chr22	41684113	41684981
chr11	62323532	62324962
chr19	44711332	44711932
chr19	52097046	52098258
chr6	35698998	35700543
chr1	151030650	151032502
chr16	58662789	58664685
chr3	194392504	194393551
chr12	17168792	17169840
chr6	36646106	36648608
chr20	56702363	56703338
chr6	131948960	131949744
chr19	37708539	37709464
chr5	139936631	139937380
chr1	155931308	155933004
chr1	161101548	161103159
chr1	16499487	16500761
chr15	90754342	90757055
chr8	41180392	41182628
chr3	193720498	193722238
chr11	3077648	3079173
chr14	24663930	24665521
chr12	130581890	130583056
chr19	50879344	50881160
chr14	94372471	94373535
chr4	106629427	106630478
chr15	96816774	96817321
chr19	41833069	41834992
chr6	90660348	90661677
chr8	66860734	66861310
chr20	22360086	22360499
chr16	70602655	70603183
chr14	23448049	23449461
chr1	89356676	89357738
chr19	38791123	38792083
chr14	61991679	61993824
chr21	34754667	34756420
chr5	141094691	141096090
chr12	13253681	13254822
chr19	9937859	9939458
chr2	238341048	238342721
chr11	64690895	64692625
chr12	52462993	52464419
chr9	117040769	117041666
chr14	104177413	104180148
chr7	77165734	77168315
chr9	111881201	111882579
chr7	104585221	104586044
chr1	16469863	16473509
chr3	111430884	111431962
chr9	123555292	123556056
chr16	30075329	30078130
chr10	33269300	33270411
chr12	6483866	6486155
chr14	75032969	75035225
chr10	116004616	116005607
chr11	808876	810792
chr3	169939619	169940930
chr10	75691822	75692751
chr19	54605607	54606606
chr14	24731654	24734488
chr14	24739906	24741251
chr15	69597605	69598232
chr10	33414768	33416441
chr20	30864965	30865957
chr3	184016464	184017665
chr5	6632427	6634755
chr8	146016313	146019267
chr3	194591147	194593425
chr20	61370486	61372981
chr15	67439150	67440074
chr16	86709774	86710632
chr2	20383544	20386571
chr11	2932759	2934753
chr1	236080565	236081298
chr6	6811305	6812202
chr1	12677577	12680463
chr4	75240026	75240634
chr12	56511661	56512559
chr10	81917816	81918927
chr6	7058557	7059045
chr9	38047317	38048157
chr17	10022911	10023655
chr5	36875849	36877794
chr22	39485938	39487933
chr2	65356491	65358184
chr10	47124016	47125258
chr10	123686695	123688325
chr1	16448612	16450069
chr5	33440414	33441922
chr14	69151987	69153004
chr1	94344057	94345037
chr14	75642696	75643917
chr11	355194	356598
chr19	38396995	38398291
chr2	153031712	153032886
chr6	170532545	170536957
chr17	39675579	39676461
chr12	96894792	96895260
chr11	9779443	9782027
chr19	44269160	44269907
chr3	98241133	98242130
chr3	156845177	156848998
chr22	50907491	50908965
chr1	149870742	149872051
chr3	167452096	167453744
chr1	22281722	22284941
chr1	243893236	243894459
chr2	74347079	74347894
chr5	139727603	139728208
chr19	36704927	36706364
chr11	8831911	8833100
chr19	12916693	12918607
chr8	27219124	27220228
chr19	13957177	13959038
chr2	110858739	110860451
chr19	36239021	36240014
chr2	133104723	133105407
chr2	241259121	241260246
chr8	49701198	49701834
chr8	107072584	107073040
chr16	1819163	1824818
chr4	100484461	100485372
chr11	8710197	8710861
chr8	124053775	124055229
chr9	137494163	137495105
chr1	209830354	209831664
chr8	124186426	124187364
chr1	45272469	45274632
chr4	153600866	153601896
chr19	45988425	45989803
chr7	98871564	98872460
chr1	205252987	205254339
chr1	36022427	36024930
chr16	2731430	2733049
chr17	4850388	4854487
chr3	131221365	131222030
chr3	170074112	170076397
chr14	24657370	24658412
chr16	67274376	67275922
chr19	41219865	41223522
chr22	22336709	22337464
chr19	17530318	17531532
chr8	126656226	126656985
chr15	51200129	51201351
chr1	10694166	10696664
chr5	85913471	85914396
chr19	49402865	49404404
chr2	9940783	9942391
chr11	69909231	69913442
chr7	100659947	100661182
chr16	31083757	31086272
chr16	30545504	30546769
chr10	13732158	13733533
chr12	106505872	106506659
chr20	5730627	5731352
chr12	112846844	112847818
chr2	20776967	20779572
chr19	1250652	1254542
chr19	42625358	42627009
chr10	91810959	91811687
chr2	241075183	241076428
chr1	90308675	90310038
chr12	53343343	53344315
chr1	173793139	173794238
chr2	65058226	65059078
chr9	74397892	74398555
chr19	46700647	46703104
chr2	233179869	233180936
chr5	1633566	1634783
chr1	17559091	17560742
chr17	38177168	38179017
chr14	45430798	45432220
chr2	216973766	216974453
chr12	9101559	9102921
chr14	77498731	77500645
chr15	79164687	79166195
chr11	65624116	65626006
chr12	56400748	56402319
chr18	68166049	68167229
chr5	131408818	131411429
chr1	224810962	224812264
chr1	211431658	211434460
chr10	135088072	135090913
chr12	105629366	105630308
chr1	95074216	95075523
chr1	161171455	161172573
chr11	64948169	64952294
chr8	131006740	131008895
chr1	6445276	6446840
chr11	64883719	64885968
chr1	110090678	110091749
chr11	67195377	67196638
chr8	142036341	142037594
chr1	54518205	54519711
chr19	44860473	44861206
chr22	50622503	50624902
chr4	152020282	152021372
chr14	96967954	96969584
chr19	11247929	11250932
chr14	105556347	105561135
chr8	145549422	145551506
chr5	891111	894340
chr1	209989169	209990199
chr6	224365	226363
chr19	38794154	38796595
chr1	27187774	27189025
chr8	95565286	95566168
chr15	42124946	42125469
chr19	44487994	44488723
chr20	33264308	33265735
chr2	231084423	231085058
chr17	16438764	16439743
chr17	43247911	43250809
chr17	43137515	43139000
chr9	123637702	123640088
chr8	119047309	119047717
chr11	65487228	65488689
chr1	17516425	17517575
chr17	78694467	78695529
chr3	141659064	141659598
chr13	29232875	29233776
chr11	72460911	72464236
chr22	46402160	46404473
chr2	133196187	133196668
chr9	140148613	140151414
chr2	95939440	95942494
chr19	32895930	32897608
chr1	30181714	30183164
chr7	134872972	134874160
chr14	74035721	74037498
chr17	43200863	43202316
chr11	119553823	119556843
chr7	1978242	1980833
chr2	74681850	74682690
chr19	15559713	15561354
chr8	22572544	22573835
chr4	47915906	47917051
chr2	113299346	113300507
chr11	121334984	121335682
chr2	102246616	102247670
chr16	58426086	58427039
chr18	72264345	72266171
chr1	38155265	38156941
chr22	36924699	36926047
chr14	61822591	61823069
chr1	235132775	235133723
chr19	13885043	13885930
chr17	79059848	79061605
chr14	69864304	69865885
chr1	36554080	36555203
chr16	80060884	80061507
chr3	197462959	197464493
chr2	24298878	24300578
chr7	137566813	137567553
chr21	30364743	30365557
chr9	115818686	115819409
chr1	96207795	96208803
chr2	10429870	10430563
chr9	132585992	132586955
chr6	29647285	29649149
chr11	47429389	47431089
chr5	102897984	102898773
chr14	50234145	50235752
chr10	112158061	112158860
chr1	160312465	160313656
chr1	36689402	36690859
chr2	113384050	113385377
chr18	59273718	59274407
chr10	126342286	126344379
chr21	46431860	46433505
chr10	97889320	97890557
chr5	149828638	149829818
chr20	1098886	1100225
chr3	134100671	134101328
chr12	76371462	76372192
chr1	40505323	40507132
chr10	112112883	112113950
chr3	190251235	190251762
chr2	191884858	191886293
chr14	23449682	23452432
chr16	30967890	30970361
chr16	789441	791663
chr7	5567341	5571748
chr15	100650806	100652575
chr9	127594707	127595659
chr9	132124450	132125205
chr10	12890862	12892287
chr17	15823996	15824634
chr11	841886	844982
chr19	58665579	58666974
chr2	110871481	110874440
chr2	642884	643916
chr10	113987084	113987802
chr10	12237415	12238519
chr1	249119721	249120941
chr10	135106358	135107475
chr15	34634889	34635623
chr16	30569074	30570318
chr19	18263091	18265532
chr8	11141490	11142767
chr2	233766091	233767264
chr6	37515303	37516352
chr17	80255141	80257331
chr22	37702563	37704419
chr2	72262506	72263603
chr2	20435433	20436426
chr3	194838373	194839901
chr14	77563898	77565550
chr9	135819372	135821335
chr16	12120793	12121431
chr6	44026038	44027766
chr11	17098778	17100090
chr2	70608925	70609427
chr19	19626122	19627642
chr8	126441238	126445351
chr8	145632992	145635606
chr2	161061548	161062530
chr16	69599297	69601167
chr1	16090408	16092847
chr22	18553641	18554216
chr1	235116140	235117196
chr17	7358442	7359534
chr19	49254892	49256809
chr7	73427088	73428566
chr11	47270046	47271285
chr9	134131201	134132443
chr1	6359893	6362876
chr19	49945048	49947367
chr6	136609927	136611820
chr7	134854670	134856006
chr14	60618491	60618829
chr1	24117210	24118825
chr12	56497713	56499290
chr6	30736478	30737765
chr22	36025135	36026859
chr11	111944699	111945619
chr12	7052982	7054102
chr2	9374229	9376269
chr1	9747052	9748745
chr17	38674621	38675486
chr1	110802168	110802776
chr12	106424177	106424801
chr19	52489936	52490456
chr6	10694422	10695466
chr11	66205654	66206922
chr3	180319478	180320478
chr10	6260690	6261758
chr16	84839738	84841089
chr1	3712408	3713428
chr17	28690711	28691239
chr2	84685698	84687037
chr12	95597999	95598643
chr12	28283544	28283999
chr3	156272510	156273511
chr15	41099063	41100746
chr8	124252987	124254064
chr9	101820101	101820825
chr8	143315837	143317527
chr17	48114370	48115817
chr17	899677	900864
chr14	20880878	20881934
chr14	23319793	23321177
chr19	12791830	12793207
chr22	18560155	18561620
chr15	100104531	100107200
chr7	130013209	130014400
chr17	21190105	21192230
chr12	49110068	49111236
chr16	278648	280017
chr7	2559729	2565323
chr10	134716584	134717193
chr1	100434873	100436193
chr12	48499314	48500298
chr14	65183256	65184886
chr17	5371403	5372666
chr7	151450973	151452559
chr19	42617677	42619007
chr11	69638385	69641197
chr1	31885629	31889575
chr15	35261505	35262234
chr19	37063849	37064886
chr17	41560884	41561816
chr12	110887400	110888532
chr12	90647508	90647909
chr16	87837335	87838933
chr6	144416466	144417594
chr8	141520453	141522618
chr16	9161923	9162646
chr1	156251600	156253083
chr16	72126921	72128350
chr15	74274017	74276644
chr12	38710292	38710925
chr3	5067803	5068843
chr20	33113222	33114265
chr6	88410541	88412300
chr8	135724537	135725968
chr11	9385079	9386383
chr16	685704	687145
chr17	73120026	73121537
chr8	126524920	126526233
chr2	81708271	81709508
chr5	137910638	137912008
chr10	95461963	95462719
chr1	44434956	44436491
chr2	74708891	74710830
chr20	37075071	37075859
chr3	156543653	156544777
chr13	41345014	41345579
chr10	27529142	27531390
chr19	3185062	3186599
chr10	24772613	24773020
chr16	75142585	75144372
chr5	66306449	66307609
chr1	1341979	1343682
chr1	234508756	234509711
chr2	241525168	241526812
chr14	103057735	103060315
chr1	203829507	203831185
chr7	92157026	92158401
chr1	204484909	204486010
chr1	5711658	5713452
chr9	132646633	132649481
chr13	103450884	103453286
chr12	70082690	70083275
chr9	137270217	137273400
chr1	109618371	109618930
chr9	97021242	97022357
chr1	42799901	42801537
chr6	33265368	33268170
chr8	67340401	67342489
chr11	82996585	82997698
chr14	24710961	24713024
chr12	32268552	32268989
chr11	60828752	60829685
chr9	100503258	100504377
chr5	43063782	43065356
chr1	28522975	28524495
chrM	3220	4056
chr9	26946875	26947719
chr20	36618958	36619400
chr6	158184093	158184858
chr20	33680034	33681253
chr15	59576100	59577032
chr11	65728685	65729693
chr6	108615782	108616864
chr1	109781631	109784208
chr3	194817620	194819064
chr11	65337227	65338472
chr10	65389182	65390869
chr14	24896091	24898104
chr11	47968484	47969172
chr17	875579	876728
chr20	2082231	2084219
chr15	86328326	86330004
chr17	71621134	71622956
chr2	73963998	73965166
chr3	186500612	186502269
chr7	44923874	44925813
chr14	81407620	81408382
chr2	45876892	45880029
chr14	87599622	87600208
chr20	33892637	33895578
chr14	103993546	103996327
chr11	70402807	70404753
chr10	69609048	69609895
chr2	202315778	202317104
chr5	148930216	148931495
chr10	118893041	118894819
chr1	33592553	33593998
chr19	18588820	18590209
chr7	98865014	98866174
chr9	125675165	125676408
chr20	23123740	23124093
chr7	2859626	2860740
chr11	75110320	75111070
chr18	68089332	68089687
chr1	44395085	44395784
chr7	99005726	99007308
chr17	33904904	33906065
chr9	130681300	130682449
chr17	49230550	49231514
chr9	131418170	131419567
chr1	230240167	230241450
chr14	54778856	54779417
chr1	8064736	8065413
chr2	201980148	201981933
chr3	196358697	196360311
chr2	70417515	70418375
chr17	18217377	18219432
chr9	94877243	94877994
chr17	75415877	75419079
chr14	93650406	93651837
chr16	67906544	67907729
chr17	7338128	7342464
chr10	3852151	3852681
chr13	41019417	41020269
chr8	17779899	17781783
chr17	55979714	55981106
chr19	38493776	38494722
chr19	39563959	39564724
chr2	110370895	110373638
chr9	33458262	33459073
chr11	70908034	70910944
chr18	11850995	11852193
chr14	74353090	74354141
chr17	38665911	38667081
chr15	31726340	31727908
chr2	99952237	99953230
chr9	130496781	130497874
chr20	2820166	2822147
chr14	35872195	35874694
chr2	21022058	21023098
chr8	122736391	122737220
chr22	38148045	38149299
chr1	109825282	109826490
chr9	88968632	88969936
chr15	99994122	99995715
chr20	61283117	61284981
chr3	142719750	142721150
chr9	115512508	115514183
chr9	132403684	132405171
chr1	2158020	2159504
chr1	227922208	227923824
chr1	6353924	6355563
chr16	57652745	57656102
chr10	29767692	29768768
chr17	30771025	30772441
chr22	27067000	27069538
chr11	113644024	113644798
chr10	47056120	47058813
chr19	13345170	13346626
chr14	55517491	55519033
chr12	11801504	11803381
chr11	63605594	63608097
chr16	67875533	67877557
chr2	197504029	197504768
chr19	37861451	37862383
chr2	20689973	20691052
chr3	121713976	121714845
chr9	100953046	100955924
chr12	9825995	9827109
chr2	191878517	191879500
chr1	12540816	12541530
chr11	112192154	112193075
chr7	99102012	99103195
chr11	64012383	64014078
chr1	208392046	208393555
chr19	56630862	56633227
chr17	4633987	4635426
chr2	219081155	219082819
chr10	116079849	116080928
chr12	6323596	6324791
chr12	124085996	124087121
chr1	244815814	244817135
chr5	60457808	60458959
chr14	105437809	105440832
chr12	6470811	6471757
chr6	52366989	52369871
chr14	23298540	23299535
chr1	174968020	174969844
chr10	35378732	35379791
chr19	10675612	10678261
chr7	30633560	30635179
chr7	102104536	102106197
chr10	104261564	104262896
chr1	33282366	33284177
chr19	19050586	19052630
chr14	39643643	39645145
chr6	34855363	34856156
chr11	68670733	68672258
chr12	49658121	49659961
chr6	28367102	28367993
chr14	69142995	69143827
chr8	143866418	143872328
chr10	53458527	53460054
chr12	125398507	125400008
chr9	93704831	93705461
chr6	88182239	88183373
chr17	72199360	72200499
chr12	110151150	110151622
chr12	124117809	124119027
chr3	179322061	179322907
chr16	769806	772564
chr22	30987511	30988481
chr7	97983409	97984920
chr1	155112341	155113293
chr1	41363995	41365866
chr14	77842711	77844127
chr19	17377744	17378695
chr11	107435853	107436759
chr12	128043945	128044824
chr9	139303928	139305801
chr17	14641296	14642175
chr1	10002807	10003776
chr19	58513444	58514942
chr16	15685968	15686822
chr14	50469372	50470806
chr10	88727785	88732724
chr9	127028427	127030168
chr8	125984928	125986088
chr20	33734275	33735448
chr1	89989634	89991128
chr1	63988708	63989380
chr4	10022274	10023564
chr8	10511228	10512987
chr8	41649065	41650285
chr19	10763782	10765909
chr3	171874064	171874499
chr12	111846914	111848896
chr16	30365721	30368261
chr2	69869912	69871926
chr3	134203997	134205547
chr20	60924816	60926172
chr8	102038199	102040274
chr11	65188404	65192060
chr5	1344433	1346442
chr12	109208241	109209600
chr22	33387577	33388386
chr6	151772936	151774073
chr8	143781025	143783029
chr14	78265960	78267103
chr17	41150104	41151446
chr22	30162319	30163714
chr10	44143703	44144684
chr12	3326037	3328404
chr1	38477874	38478844
chr19	39926077	39927037
chr20	3140074	3141210
chr22	50741579	50746203
chr1	8284630	8285486
chr22	21212294	21213757
chr20	4529260	4529677
chr12	52636081	52638801
chr22	39077587	39078570
chr8	42697756	42698882
chr10	33298975	33299726
chr12	31902049	31902588
chr17	17942063	17944080
chr5	36151199	36152458
chr1	153579823	153582089
chr19	44455094	44455783
chr22	41681240	41682880
chr11	72430632	72434211
chr14	102197333	102198729
chr1	36929113	36930401
chr6	31619406	31621284
chr2	1628751	1629772
chr5	178069013	178070094
chr11	65185383	65188026
chr3	158362069	158362726
chr1	2382858	2384700
chr2	118571995	118572824
chr6	170714625	170715573
chr1	44350727	44351654
chr14	91090225	91090972
chr2	200819815	200820968
chr22	19418278	19420529
chr22	37624408	37627289
chr1	207068646	207069547
chr6	169740034	169740900
chr1	113247085	113249011
chr1	109234506	109236313
chr14	105563440	105564414
chr16	3018328	3023228
chr3	183734740	183736215
chr9	100638937	100640361
chr3	57955368	57956019
chr5	180236565	180238287
chr1	156474416	156475447
chr1	16766644	16767983
chr15	89938383	89939568
chr19	36035833	36037221
chr9	139257358	139259181
chr2	85726005	85726830
chr1	101360200	101362408
chr1	235147030	235148769
chr14	105146341	105149001
chr2	10592003	10592956
chr19	47986700	47987817
chr7	45150714	45151821
chr16	71841959	71843385
chr17	7922439	7923966
chr3	149955215	149956317
chr4	107236816	107237983
chr11	63655636	63657479
chr3	182347308	182347702
chr3	191046821	191048106
chr17	43238182	43240011
chr19	55699895	55701426
chr5	16935282	16937586
chr2	43160817	43161639
chr12	52548667	52549765
chr2	161064557	161065035
chr3	169565644	169566089
chr8	37915172	37916000
chr19	11379393	11380158
chr17	65362104	65362947
chr2	55131153	55131938
chr19	9545752	9546980
chr2	228682689	228684051
chr5	173060230	173060997
chr15	93351748	93353168
chr6	35359622	35361297
chr10	103814754	103816285
chr1	153962595	153963759
chr19	18867436	18868439
chr6	108581534	108583214
chr12	28126595	28129104
chr16	87823121	87825456
chr17	42091641	42092641
chr16	3284249	3285587
chr1	38157017	38158968
chr21	27106768	27108413
chr22	20884478	20886916
chr6	26987355	26988323
chr17	80453273	80456139
chr4	153944313	153945632
chr9	130546597	130549181
chr12	52917537	52919600
chr10	80908032	80913097
chr16	30596227	30597866
chr19	11205013	11207514
chr20	62504755	62505475
chr1	11629420	11630168
chr5	151007352	151008379
chr3	113774905	113776158
chr12	50418766	50419622
chr19	38489637	38490884
chr12	107778950	107779869
chr19	57874421	57875501
chr3	178865440	178867254
chr19	58693595	58695664
chr4	77996507	77997688
chr11	65626516	65629030
chr1	26946654	26948330
chr19	11530293	11535074
chr22	22019448	22020844
chr7	6629097	6630500
chr6	151710768	151713128
chr17	75281039	75285210
chr3	189655299	189655976
chr6	26596816	26597724
chr14	75348145	75349303
chr8	124407903	124409172
chr7	642866	644938
chr10	71491226	71493200
chr3	128444624	128445877
chr2	239538468	239539172
chr10	105505181	105505930
chr11	72447249	72448455
chr15	41061034	41062749
chr1	199241775	199242187
chr11	61196671	61198002
chr15	70786766	70787581
chr11	69793645	69798575
chr1	155277888	155279203
chr15	40452777	40453710
chr22	24188331	24189309
chr1	227002676	227003181
chr8	126422653	126423721
chr3	12882400	12883428
chr19	42386652	42388857
chr12	56582359	56584314
chr3	101443229	101444339
chr9	98188883	98189683
chr20	31988887	31989574
chr16	85393682	85394495
chr14	77419512	77420570
chr2	20623967	20625459
chr9	72661011	72661843
chr9	127951338	127952536
chr20	17830280	17831265
chr1	24437237	24439531
chr17	55926678	55928140
chr12	121123895	121125882
chr8	121457098	121457907
chr12	52913572	52916987
chr19	13132927	13135068
chr3	101231311	101232402
chr8	101962471	101965808
chr7	73453557	73455378
chr1	109632936	109633785
chr12	56545496	56547021
chr17	63118840	63119744
chr7	120590472	120591498
chr8	22461838	22462999
chr4	185609533	185609953
chr1	3815983	3818040
chr8	142050984	142052150
chr11	71822972	71824165
chr14	24778769	24781743
chr8	144362973	144364963
chr17	36981108	36982038
chr9	139514556	139520759
chr1	6761158	6762264
chr17	812702	813618
chr11	69048493	69049410
chr16	28935311	28937276
chr3	14165210	14168099
chr8	143807448	143810120
chr20	30310304	30312029
chr21	39019887	39020761
chr14	70825931	70826747
chr17	48784476	48785480
chr3	49937581	49941736
chr3	113549462	113550002
chr11	693252	696801
chr16	51670611	51671140
chr2	102133471	102134113
chr20	49055180	49056448
chr9	95499086	95501440
chr10	105641282	105642734
chr14	75179356	75180016
chr6	42013413	42014122
chr19	34919022	34920088
chr1	46151616	46153288
chr22	19950202	19952201
chr1	165737785	165738659
chr19	37177973	37178893
chr19	56164890	56167246
chr5	110427660	110428561
chr10	75544902	75546193
chr15	64385351	64386750
chr20	62283730	62285293
chr1	1279235	1282246
chr2	220138596	220139708
chr17	3538799	3540581
chr2	161076997	161078764
chr14	94407304	94409153
chr17	38677081	38678599
chr20	33871797	33873598
chr16	89386028	89388024
chr15	75958754	75960066
chr8	67524656	67526495
chr3	38227083	38227544
chr14	97263393	97264557
chr3	159480492	159484027
chr2	120979874	120981763
chr1	161052774	161053819
chr12	109490102	109491392
chr3	139062418	139063480
chr2	204399127	204400660
chr19	36422186	36423100
chr19	47747234	47747792
chr2	178076835	178078269
chr12	104350032	104351364
chr16	4818492	4819517
chr9	98637183	98638667
chr17	47784864	47785945
chr20	39631591	39632779
chr1	112603435	112604491
chr9	77501825	77502930
chr10	75668650	75669681
chr12	3312862	3313796
chr19	9878882	9880142
chr10	135090986	135093009
chr12	106327636	106328680
chr1	235133933	235134800
chr3	101405214	101406214
chr15	80872389	80873808
chr19	45256360	45258641
chr14	50100167	50102368
chr3	171870836	171871641
chr6	30523105	30525513
chr14	93672926	93674500
chr12	120105396	120106351
chr19	56146076	56147207
chr7	75676809	75677865
chr14	90885325	90886359
chr1	205090661	205091671
chr19	39127384	39128023
chr14	24629654	24631892
chr12	49411811	49412934
chr3	134145439	134147065
chr19	36235219	36237146
chr1	12663844	12665078
chr19	18788702	18789191
chr19	44763639	44764362
chr8	81938428	81939151
chr11	65678642	65681381
chr14	69258880	69263287
chr19	11404009	11405002
chr1	32109742	32111218
chr14	70447008	70447971
chr14	92338766	92340269
chr13	52157542	52159462
chr19	42781617	42782631
chr11	72998437	73001143
chr17	73284783	73286392
chr12	9803145	9803693
chr3	4458620	4459064
chr5	150591348	150592034
chr8	25202755	25203378
chr6	43063728	43065010
chr9	111342253	111342642
chr11	119561845	119564394
chr11	124952521	124953607
chr16	57310432	57310893
chr6	52440910	52442626
chr9	130317558	130320376
chr2	172289512	172291415
chr19	35263216	35264415
chr13	114487663	114488517
chr17	48450201	48450901
chr18	9016448	9018141
chr3	127872009	127872920
chr5	169757898	169758960
chr11	2196470	2197387
chr6	157469449	157470357
chr6	41753180	41755872
chr11	63741525	63742846
chr22	38070862	38073606
chr1	3387347	3391000
chr14	71067160	71067849
chr11	118229898	118230740
chr15	70053206	70053817
chr11	65149126	65150941
chr19	12834181	12835437
chr20	61286163	61289237
chr1	222012896	222013642
chr1	3229375	3230921
chr13	114102866	114104122
chr3	52440058	52441261
chr11	70840118	70841566
chr14	23775589	23776575
chr14	103592926	103596676
chr19	37957639	37958749
chr20	25217952	25219581
chr2	70172033	70173589
chr6	29932613	29933292
chr19	12605809	12606906
chr11	69050829	69053555
chr11	116643215	116644305
chr1	167189030	167191593
chr1	30063693	30064144
chr16	19016810	19017707
chr5	149401305	149401837
chr16	4320258	4324591
chr2	201935993	201936886
chr2	234599872	234600432
chr1	23694264	23696400
chr14	61645046	61645702
chr19	12661658	12663212
chr11	66101905	66107282
chr1	173683812	173684652
chr3	193787764	193790152
chr3	197243309	197244436
chr6	31509235	31510789
chr13	25496468	25497435
chr12	124863660	124865460
chr3	194751031	194752290
chr3	183966181	183968361
chr1	151042726	151043841
chr14	35805566	35806613
chr12	49628184	49629358
chr17	40305877	40308027
chr7	44416867	44418185
chr1	59314325	59315095
chr3	57541517	57542575
chr7	73507177	73509591
chr3	185540941	185544616
chr22	28150075	28151327
chr2	31623924	31624806
chr1	17814241	17814968
chr20	62338118	62340303
chr9	123996527	123997116
chr11	6639789	6640905
chr1	203619186	203620147
chr13	107028507	107029477
chr8	80740499	80740994
chr9	138818229	138820180
chr10	135121227	135123576
chr12	66113780	66114404
chr11	35180163	35180676
chr11	67979958	67982934
chr2	237780160	237780612
chr2	65170420	65172321
chr3	111867545	111868864
chr2	180871380	180872304
chr7	44678259	44679787
chr3	194206514	194209369
chr7	765523	767953
chr14	54422277	54423996
chr20	35806842	35808282
chr9	101017311	101019017
chr16	53468037	53469484
chr16	69759424	69761798
chr14	54955099	54956180
chr17	1944732	1946190
chr19	19302698	19304207
chr20	50807038	50809203
chr11	12211090	12211749
chr14	91975521	91977411
chr6	11277239	11278688
chr10	122610493	122611166
chr11	72938636	72939846
chr1	33812555	33813019
chr1	22259857	22261033
chr14	59827771	59828586
chr12	75904996	75905734
chr3	176914078	176915984
chr2	70779599	70782242
chr12	96820939	96821449
chr7	100887355	100889222
chr19	56825449	56827161
chr1	39649318	39650043
chr12	89747008	89748751
chr5	133459676	133461720
chr8	144348566	144350408
chr10	104180373	104182886
chr11	134122666	134123860
chr6	106581977	106583551
chr3	196594321	196595595
chr19	13208293	13214758
chr4	13629094	13629885
chrX	68045906	68046925
chr14	70010215	70010778
chr8	103768694	103769624
chr3	158519329	158520695
chr4	153455902	153458145
chr9	140099589	140100576
chr10	74113570	74115083
chr1	159892721	159896067
chr15	64679694	64680872
chr20	34638544	34639184
chr6	143223829	143224168
chr19	58986740	58989526
chr12	64797745	64799113
chr17	38672874	38673919
chr9	91925169	91926727
chr14	93617733	93618299
chr19	52429700	52431108
chr12	51157036	51158870
chr11	9405916	9407169
chr12	123942395	123943668
chr16	8891112	8892119
chr20	36661450	36662770
chr2	234390228	234391042
chr9	73032792	73036489
chr10	75489857	75490642
chr14	99561251	99561746
chr3	155026543	155026957
chr22	36724582	36726259
chr19	28283929	28285513
chr19	45004139	45005050
chr20	11247852	11248357
chr2	228189723	228190865
chr11	67084438	67085980
chr6	33854444	33855061
chr2	70368170	70370235
chr6	33256524	33257910
chr21	9826661	9827645
chr14	76617892	76619073
chr14	99375004	99376187
chr8	146077263	146079115
chr9	131643252	131645968
chr11	57424712	57425464
chr14	105552800	105555886
chr11	102187894	102188608
chr15	52860501	52861709
chr5	180287412	180288925
chr9	132564964	132566322
chr8	117886169	117887313
chr15	77712643	77713788
chr20	1396444	1397715
chr6	143771390	143772326
chr11	449551	451673
chr16	85388013	85389180
chr17	17990936	17991807
chr17	76325365	76326080
chr15	42327220	42327906
chr17	48137239	48140605
chr11	124669260	124670897
chr1	155231359	155232520
chr10	124133824	124135212
chr17	76380012	76380500
chr2	201753209	201754998
chr14	74004317	74005205
chr17	6542703	6544940
chr17	76250092	76250875
chr1	9391531	9391976
chr19	45244347	45246282
chr6	11770370	11771894
chr11	60673387	60674445
chr2	47270074	47271759
chr10	131818643	131822639
chr10	43277133	43278913
chr19	12273366	12274482
chr22	46034781	46036175
chr6	15133104	15133892
chr1	183247586	183249494
chr22	43093213	43094131
chr4	2414242	2415507
chr4	2420101	2420983
chr16	87798613	87800395
chr20	18487918	18488919
chr22	38003917	38005589
chr7	984467	986083
chr12	69181283	69181769
chr17	8286059	8287370
chr19	37959828	37960758
chr3	105121106	105121781
chr9	130340787	130342134
chr16	30816351	30817921
chr19	17969967	17972265
chr9	130281476	130282557
chr14	77278421	77279559
chr18	74271067	74271742
chr1	205417203	205420688
chr1	17534311	17535390
chr1	41352241	41353216
chr19	37018850	37020043
chr21	34752260	34753330
chr2	65065051	65066359
chr6	30034399	30035374
chr2	131099282	131101116
chr17	27619409	27621631
chr11	64102292	64103302
chr2	85580969	85582453
chr17	17962250	17963202
chr9	116037166	116038304
chr13	103497713	103498962
chr12	53892483	53895850
chr3	118263239	118263851
chr14	77016559	77017381
chr1	151226863	151227614
chr19	36623078	36623971
chr3	45208512	45209408
chr4	8325388	8327842
chr3	171847657	171848113
chr1	8021210	8022227
chr6	30041716	30044442
chr1	9941587	9943482
chr22	29295247	29295895
chr9	127623296	127625441
chr9	130699515	130701219
chr9	136745894	136749023
chr16	57843726	57845142
chr10	122267858	122268632
chr15	90894864	90896198
chr5	148820817	148822766
chr12	112856164	112857510
chr1	34733846	34734641
chr17	75400662	75402105
chr17	74366452	74367417
chr10	11940235	11941611
chr21	33984285	33985833
chr10	28820805	28823170
chr11	62358759	62360240
chr14	23503022	23504678
chr8	103802868	103803875
chr1	108558854	108559512
chr14	69161244	69162825
chr7	5465151	5470779
chr1	210000989	210002060
chr14	73930047	73930749
chr17	42976251	42977490
chr3	195641012	195642546
chr14	21923852	21924755
chr12	111834402	111835908
chr10	120629703	120630801
chr1	16301841	16302777
chr19	41115271	41118303
chr7	127876907	127877472
chr10	13754793	13755352
chr12	109235980	109236562
chr20	32699206	32701406
chr2	46541989	46543051
chr5	4083361	4084670
chr6	37597905	37598773
chr10	129861906	129864040
chr8	126496565	126497504
chrX	130036636	130037573
chrX	48937221	48938098
[truncated: 24,970 more rows]
