# Supplementary material for: Molecular dissection of the oncogenic role of ETS1 in the mesenchymal subtypes of head and neck squamous cell carcinoma
Source: PLoS Genet. 2019 Jul 15;15(7):e1008250. doi: 10.1371/journal.pgen.1008250 (PMC6657958; doi:10.1371/journal.pgen.1008250)
Supplement: S8 Table — Column A represents the genes associated with the ETS1 Mesenchymal Gene Signature, as determined (details in the methods section). Columns B-G represent the raw DESeq2 generated output. (XLSX) [file pgen.1008250.s018.xlsx]

## Sheet: deg_shETS1_vs_shCON_minexpress_
	baseMean	log2FoldChange	lfcSE	stat	pvalue	padj
SKI	557.162	-1.201	0.155183	-7.73925	1.00008e-14	1.65895e-13
PTCHD2	35.165	-1.77505	0.395859	-4.48405	7.3239e-06	4.01356e-05
TNFRSF8	172.115	-2.79527	0.248715	-11.2388	2.62792e-29	1.2087e-27
EPHB2	934.593	-1.05685	0.118553	-8.91463	4.89436e-19	1.14861e-17
TMEM200B	163.779	-1.05744	0.232439	-4.54933	5.38168e-06	3.02832e-05
LAPTM5	33.2165	-2.88378	0.423473	-6.80982	9.77217e-12	1.16899e-10
SYNC	178.431	1.83434	0.227051	8.079	6.53009e-16	1.19883e-14
FHL3	140.482	-1.46609	0.246886	-5.93834	2.87923e-09	2.57425e-08
TSPAN2	84.7288	-1.06505	0.295081	-3.60935	0.000306967	0.00124129
NES	138.013	-2.12845	0.256832	-8.28732	1.1583e-16	2.24887e-15
KIRREL	1662.56	-1.18333	0.124743	-9.48617	2.39689e-21	6.60759e-20
CD1D	40.0779	-1.49826	0.377984	-3.96383	7.37583e-05	0.000337175
LMOD1	35.3361	1.90757	0.396764	4.80781	1.5259e-06	9.38119e-06
HSD11B1	13.0476	-1.91188	0.446861	-4.27846	1.88189e-05	9.60315e-05
PLXDC2	1574.58	2.23077	0.103832	21.4843	2.1812e-102	8.52749e-100
NRP1	1452.04	-1.05275	0.102152	-10.3056	6.64434e-25	2.38614e-23
RHOBTB1	112.88	-1.06942	0.262971	-4.06667	4.76899e-05	0.000225808
COL13A1	117.796	-1.47317	0.279414	-5.27234	1.34699e-07	9.63445e-07
ANKRD1	319.601	-1.01063	0.173477	-5.82574	5.68591e-09	4.88069e-08
HTRA1	3249.66	1.5967	0.094467	16.9022	4.33596e-64	6.71956e-62
MICAL2	1184.67	-1.17309	0.127865	-9.17444	4.53946e-20	1.14163e-18
INSC	23.001	-1.4954	0.430108	-3.4768	0.000507443	0.00195543
FIBIN	74.5748	1.08474	0.30832	3.51823	0.000434444	0.00170118
LPXN	1072.95	-3.49015	0.137789	-25.3296	1.50919e-141	1.23624e-138
ALDH3B1	704.275	1.48419	0.131279	11.3056	1.23047e-29	5.76743e-28
MMP7	2558.56	5.12898	0.124024	41.3549	0	0
ZBTB16	446.335	1.82198	0.156329	11.6548	2.16839e-31	1.12351e-29
NNMT	4855.37	1.63608	0.089251	18.3312	4.66492e-75	1.01577e-72
TAGLN	490.532	1.35505	0.152169	8.9049	5.34348e-19	1.25059e-17
CLMP	1461.18	-1.44495	0.104979	-13.7641	4.19096e-43	3.65954e-41
ETS1	1081.56	-2.83063	0.128995	-21.9437	9.94997e-107	4.27899e-104
FLI1	337.825	-3.22003	0.198702	-16.2053	4.62695e-59	6.16999e-57
NINJ2	180.371	1.18943	0.222583	5.34376	9.10386e-08	6.69823e-07
PPFIBP1	2083.23	-1.0626	0.10364	-10.2528	1.15023e-24	4.02979e-23
AMIGO2	3748.07	-1.40873	0.0823707	-17.1024	1.42511e-65	2.31272e-63
DDN	43.499	-1.51544	0.369499	-4.10133	4.10775e-05	0.000196829
FMNL3	105.255	-1.38142	0.27493	-5.02463	5.04414e-07	3.31909e-06
KRT81	79.5927	-1.62593	0.309318	-5.25649	1.46834e-07	1.0446e-06
DCN	8984.29	3.25179	0.0841911	38.6239	0	0
CHST11	1147.65	-1.13916	0.116809	-9.75228	1.80363e-22	5.43362e-21
SSH1	927.862	-1.19553	0.133163	-8.97794	2.75887e-19	6.60057e-18
SH2B3	305.633	-1.60476	0.183901	-8.72625	2.63266e-18	5.83084e-17
SIRT4	38.7535	1.06522	0.380318	2.80087	0.00509652	0.0152497
LHFP	131.646	-1.17373	0.252727	-4.64426	3.41296e-06	1.98746e-05
TNFSF11	183.865	1.44603	0.219237	6.59575	4.231e-11	4.72915e-10
LCP1	2510.26	-1.12892	0.0885609	-12.7473	3.22555e-37	2.23734e-35
ATP11A	237.55	-1.30411	0.23206	-5.61973	1.9126e-08	1.54029e-07
CFL2	1981.33	1.03178	0.0952862	10.8282	2.52954e-27	1.04348e-25
PTGER2	749.873	1.71617	0.133155	12.8885	5.22402e-38	3.68294e-36
BMP4	62.9196	1.23063	0.330919	3.71882	0.000200159	0.000840608
SAMD4A	1660.22	1.78996	0.100226	17.8593	2.44603e-71	4.83639e-69
TGFB3	144.262	1.0676	0.244439	4.36753	1.25661e-05	6.60439e-05
GALC	1293.16	1.25814	0.106054	11.8633	1.83634e-32	1.02229e-30
FMN1	268.792	-1.05688	0.192798	-5.48181	4.21e-08	3.24755e-07
AQP9	31.1707	3.20237	0.431282	7.42523	1.12585e-13	1.67388e-12
APH1B	220.78	1.56217	0.205717	7.59378	3.10707e-14	4.92606e-13
CD276	626.366	-1.32223	0.13982	-9.45665	3.17955e-21	8.69548e-20
MFGE8	382.933	1.136	0.161582	7.03048	2.05825e-12	2.62656e-11
ANPEP	299.361	-2.23846	0.217469	-10.2932	7.56065e-25	2.68715e-23
TMEM204	101.901	-3.52986	0.33139	-10.6517	1.71249e-26	6.64971e-25
XYLT1	484.211	-1.44765	0.163381	-8.86059	7.95892e-19	1.84018e-17
TGFB1I1	109.921	-1.08435	0.271509	-3.9938	6.50216e-05	0.000299874
MMP2	1481.28	-1.39422	0.116326	-11.9855	4.23376e-33	2.46878e-31
MT1F	106.21	-1.37984	0.278823	-4.94883	7.46623e-07	4.79053e-06
CDH11	136.731	-3.10793	0.281341	-11.0468	2.27079e-28	9.91427e-27
FAM65A	97.2346	-1.2648	0.285868	-4.42443	9.66992e-06	5.19494e-05
SLC43A2	388.204	1.294	0.165212	7.83236	4.78797e-15	8.17089e-14
SERPINF1	217.256	1.77204	0.213533	8.29869	1.05267e-16	2.05307e-15
GLP2R	98.153	2.35944	0.294767	8.00442	1.20035e-15	2.15761e-14
PMP22	226.998	-1.00932	0.202603	-4.98175	6.30102e-07	4.08249e-06
SLFN11	159.852	-1.51832	0.234849	-6.46508	1.01246e-10	1.07841e-09
AP2B1	4684.61	-1.01659	0.100446	-10.1207	4.47158e-24	1.50529e-22
RARA	102.736	-1.0766	0.280962	-3.83184	0.000127188	0.000553194
IGFBP4	1180.4	-1.12951	0.118089	-9.56492	1.12285e-21	3.17685e-20
FKBP10	284.077	-1.56283	0.189186	-8.26077	1.44733e-16	2.7849e-15
CNTNAP1	42.8351	-1.48527	0.371297	-4.00022	6.32844e-05	0.000292718
GJC1	837.727	-1.36069	0.153078	-8.8889	6.17165e-19	1.4366e-17
DNAH17	273.358	-1.05713	0.191955	-5.50717	3.64655e-08	2.83965e-07
GATA6	233.18	-1.46931	0.202717	-7.24807	4.22752e-13	5.84111e-12
GADD45B	709.02	1.57273	0.135967	11.567	6.05519e-31	3.05459e-29
COL5A3	124.066	1.91587	0.262085	7.31009	2.66966e-13	3.78907e-12
GRAMD1A	226.502	-1.10161	0.204125	-5.39675	6.78579e-08	5.08181e-07
AXL	1413.72	-1.04659	0.107192	-9.76376	1.61069e-22	4.90392e-21
PLAUR	313.669	-1.32712	0.176358	-7.52516	5.26574e-14	8.13848e-13
KCNN4	121.077	-1.57179	0.26269	-5.98344	2.18469e-09	1.98632e-08
IGSF23	21.9333	2.55395	0.440856	5.79316	6.90759e-09	5.87367e-08
APOE	822.872	1.45232	0.136093	10.6715	1.38346e-26	5.42103e-25
PLEKHA4	264.575	-1.37138	0.190407	-7.20236	5.91786e-13	8.0857e-12
MYADM	215.977	-1.20486	0.215298	-5.59623	2.19058e-08	1.74941e-07
CACNG6	26.0052	-1.34148	0.418657	-3.20425	0.00135417	0.00470594
RNF144A	210.576	-1.42805	0.210758	-6.77578	1.23733e-11	1.45985e-10
FAM49A	334.519	2.08228	0.193706	10.7497	5.94748e-27	2.41294e-25
LBH	713.941	1.78608	0.132208	13.5096	1.37211e-41	1.13476e-39
SH3RF3	52.9748	-1.6278	0.353326	-4.60708	4.08367e-06	2.35334e-05
CYBRD1	3190.99	1.5968	0.0900125	17.7397	2.07028e-70	3.78862e-68
FKBP7	127.032	1.04916	0.253274	4.14239	3.43708e-05	0.00016716
CERKL	130.447	-1.10999	0.249737	-4.44463	8.80423e-06	4.76559e-05
PDE1A	168.606	1.4349	0.230223	6.23267	4.58539e-10	4.54365e-09
AOX1	901.857	1.87085	0.122326	15.2939	8.39826e-53	1.00324e-50
NRP2	393.756	-1.92449	0.179488	-10.7221	8.01747e-27	3.19251e-25
TNS1	138.903	-1.05882	0.274381	-3.85893	0.000113882	0.00050064
ARL4C	1540.31	-1.34272	0.100522	-13.3575	1.07054e-40	8.56529e-39
MYL9	16.551	1.41237	0.441775	3.19704	0.00138846	0.00481435
TGM2	276.791	1.25181	0.184261	6.79367	1.09313e-11	1.29862e-10
JPH2	279.137	1.287	0.188561	6.82538	8.76916e-12	1.05414e-10
ADAMTS1	77.8041	-1.07584	0.306301	-3.51237	0.000444132	0.0017336
PTTG1IP	5515.54	1.45594	0.0780368	18.657	1.10701e-77	2.53904e-75
COL6A2	565.423	1.12023	0.146685	7.63695	2.22421e-14	3.57244e-13
SCARF2	51.9327	-1.83903	0.359434	-5.11646	3.11328e-07	2.11511e-06
SUSD2	40.0389	2.16206	0.387996	5.57237	2.51297e-08	1.99575e-07
ASPHD2	75.8192	-1.09815	0.306696	-3.58059	0.000342822	0.0013724
LIF	49.0113	-2.88532	0.38749	-7.44617	9.60895e-14	1.43858e-12
C1QTNF6	188.464	-1.43685	0.226057	-6.35614	2.06885e-10	2.13103e-09
PDGFB	90.3894	-1.33679	0.292621	-4.56834	4.91593e-06	2.78079e-05
COL8A1	2443.72	2.2367	0.0941479	23.7573	9.23247e-125	5.47645e-122
CCDC80	1830.21	2.94477	0.10315	28.5486	2.92454e-179	3.35386e-176
FSTL1	7585.43	1.08687	0.0776303	14.0005	1.54696e-44	1.40057e-42
SLCO2A1	101.718	-1.91221	0.295943	-6.46143	1.03717e-10	1.10336e-09
MRAS	120.116	1.34562	0.267441	5.03146	4.86759e-07	3.21306e-06
MME	11359.1	2.455	0.079927	30.7155	3.53228e-207	5.52384e-204
PTX3	96.8993	-1.06701	0.278755	-3.82777	0.000129311	0.000561579
PPARGC1A	181.502	2.7298	0.240809	11.336	8.70605e-30	4.12784e-28
KDR	315.896	3.53363	0.208415	16.9548	1.77426e-64	2.80007e-62
EDNRA	73.397	-1.95505	0.321221	-6.08631	1.15546e-09	1.08494e-08
TLR2	1865.39	2.33238	0.101341	23.0151	3.28892e-117	1.768e-114
CTSO	198.374	1.41646	0.215982	6.55822	5.44552e-11	6.00473e-10
FAM134B	658.027	1.52892	0.141734	10.7873	3.95206e-27	1.61481e-25
CDH18	91.8123	2.53999	0.309744	8.2003	2.39789e-16	4.52286e-15
IL7R	1047.37	-2.97323	0.125475	-23.6958	3.98192e-124	2.28323e-121
DAB2	68.7332	-1.49783	0.323552	-4.62933	3.66851e-06	2.12764e-05
PPAP2A	672.761	1.11816	0.13086	8.54467	1.28904e-17	2.71741e-16
ADAMTS6	163.137	-1.26569	0.230477	-5.49161	3.98279e-08	3.08196e-07
LHFPL2	959.338	-1.36233	0.120549	-11.301	1.29719e-29	6.06364e-28
ST8SIA4	41.6829	-3.22571	0.413002	-7.81042	5.69999e-15	9.64122e-14
LOX	5605.08	1.20425	0.213274	5.6465	1.63746e-08	1.33054e-07
ZNF474	629.939	1.40301	0.134567	10.4261	1.88525e-25	6.94433e-24
ZNF608	1337.8	1.02294	0.107445	9.52058	1.72211e-21	4.80905e-20
SPOCK1	560.243	-1.66281	0.159848	-10.4024	2.41701e-25	8.88406e-24
SPARC	38.1336	2.18442	0.395353	5.52524	3.29033e-08	2.57743e-07
ADAM19	251.578	-2.62504	0.224144	-11.7114	1.11446e-31	5.91694e-30
ADRA1B	31.0889	-1.38842	0.401643	-3.45684	0.000546542	0.00208739
GFPT2	307.347	-2.32261	0.188869	-12.2975	9.34474e-35	5.78231e-33
RNF146	712.707	1.06849	0.130368	8.19596	2.48601e-16	4.6737e-15
FAM20C	820.707	-1.62807	0.124668	-13.0592	5.62934e-39	4.12068e-37
TTYH3	375.419	-1.39644	0.199554	-6.99779	2.6004e-12	3.29639e-11
HDAC9	744.858	-1.74152	0.130837	-13.3106	2.00777e-40	1.56989e-38
CPVL	1128.57	1.64838	0.119028	13.8488	1.29424e-43	1.15355e-41
FZD1	1293.33	1.47516	0.106009	13.9154	5.10438e-44	4.59715e-42
GNG11	44.2783	-1.95486	0.377468	-5.17888	2.2322e-07	1.54582e-06
COL1A2	584.682	1.93482	0.155003	12.4825	9.305e-36	6.10934e-34
RHOBTB2	141.642	-1.15859	0.241758	-4.79235	1.64843e-06	1.00804e-05
TRIM55	29.6234	1.24438	0.403534	3.08372	0.00204433	0.00682052
PAG1	285.439	-1.29006	0.186238	-6.92693	4.30082e-12	5.30722e-11
SDC2	233.931	1.97444	0.21927	9.0046	2.16446e-19	5.22204e-18
CPQ	75.5928	1.45728	0.318501	4.57542	4.75264e-06	2.69907e-05
CTHRC1	2207.8	1.48851	0.107026	13.908	5.66714e-44	5.0774e-42
FBXO32	5964.86	1.64772	0.0845361	19.4913	1.30078e-84	3.55174e-82
ASAP1	561.772	-1.06717	0.305358	-3.49482	0.000474388	0.00183835
WISP1	50.6701	2.8655	0.382519	7.49114	6.82793e-14	1.04218e-12
GOLM1	679.333	-1.39919	0.135628	-10.3163	5.94479e-25	2.14837e-23
GAS1	986.578	1.81643	0.12609	14.4058	4.75594e-47	4.729e-45
DAPK1	5391.64	1.4859	0.0777723	19.1057	2.2629e-81	5.48259e-79
PBX3	106.046	-1.54634	0.274135	-5.64079	1.69267e-08	1.37346e-07
MXRA5	144.356	-1.7572	0.271225	-6.47874	9.24889e-11	9.9004e-10
EGFL6	134.311	1.97955	0.262401	7.54401	4.55752e-14	7.10775e-13
GPM6B	174.218	1.51417	0.228833	6.6169	3.66797e-11	4.11785e-10
SH3KBP1	1044.56	-1.8414	0.129466	-14.2231	6.5844e-46	6.1557e-44
SRPX	460.171	-1.29544	0.151212	-8.56704	1.06182e-17	2.27182e-16
TIMP1	1047.31	-1.47951	0.116154	-12.7375	3.65974e-37	2.52831e-35
